# Supplementary material for: Deforestation and climate change are projected to increase heat stress risk in the Brazilian Amazon
Source: Springer Nature journal article supplement (doi:10.1038/s43247-021-00275-8), 2021-10-01
Supplement: 43247_2021_275_MOESM1_ESM.pdf [file 43247_2021_275_MOESM1_ESM.pdf]

**Deforestation and climate change are projected to increase heat stress risk in the Brazilian Amazon**

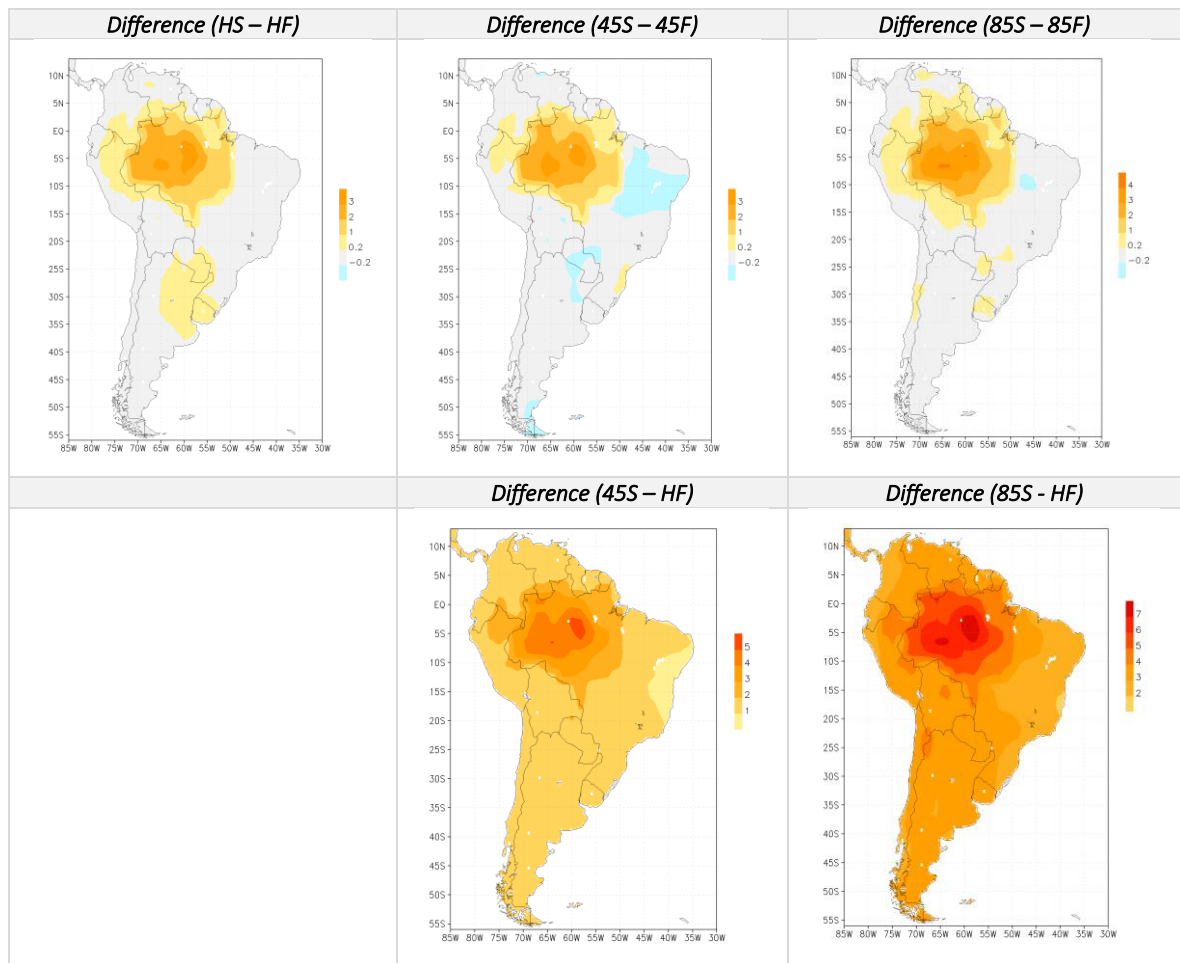

**Supplementary Figure 1. Difference of annual mean of air temperature between Amazon rainforest savannization, according with the warming scenarios RCP4.5 and RCP8.5 (2073-2100). Legend: global warming scenarios (Historical – H, RCP4.5 – 45, RCP8.5 – 85) and land use scenarios (Forested – F and Savannah – S).**

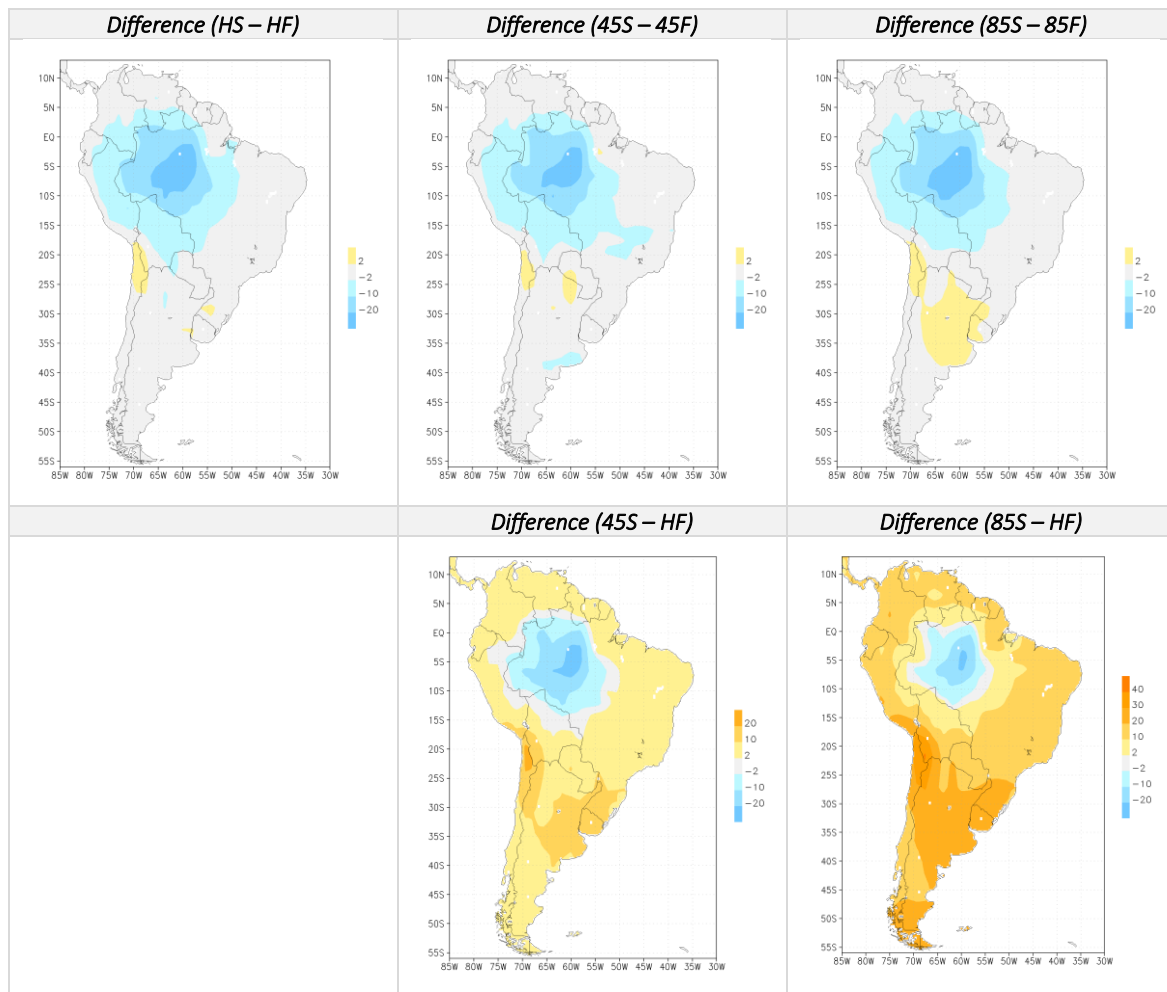

**Supplementary Figure 2. Difference percentual of annual mean of humidity between Amazon rainforest savannization, according with the warming scenarios RCP4.5 and RCP 8.5 (2073-2100).** Legend: global warming scenarios (Historical – H, RCP4.5 – 45, RCP8.5 – 85) and land use scenarios (Forested – F and Savannah – S).

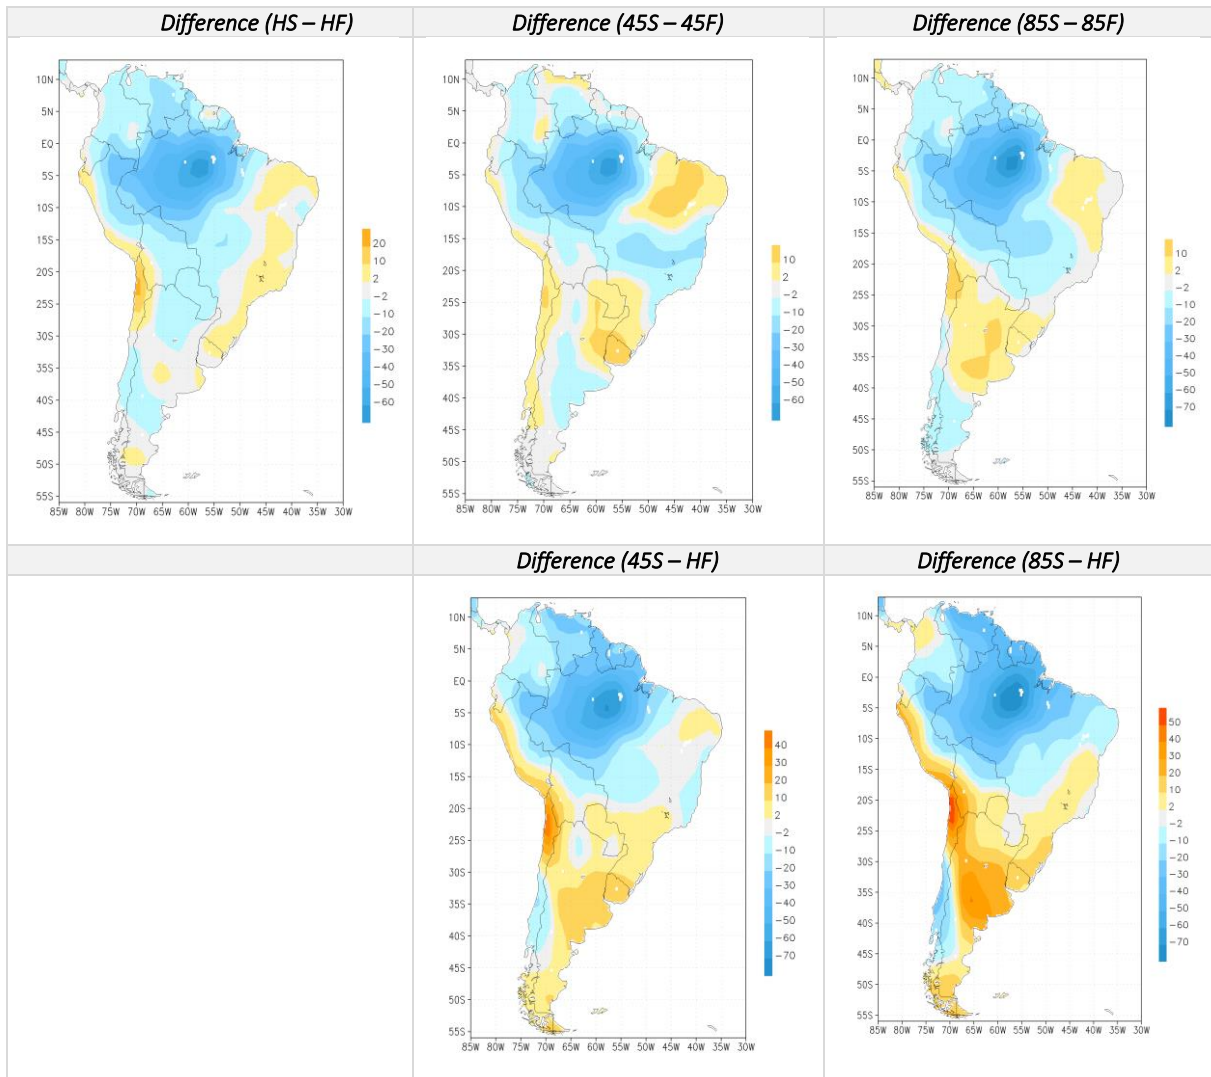

**Supplementary Figure 3. Difference percentual of annual mean of precipitation between Amazon rainforest savannization, according with the warming scenarios RCP4.5 and RCP8.5 (2073-2100). Legend: global warming scenarios (Historical – H, RCP4.5 – 45, RCP8.5 – 85) and land use scenarios (Forested – F and Savannah – S).**

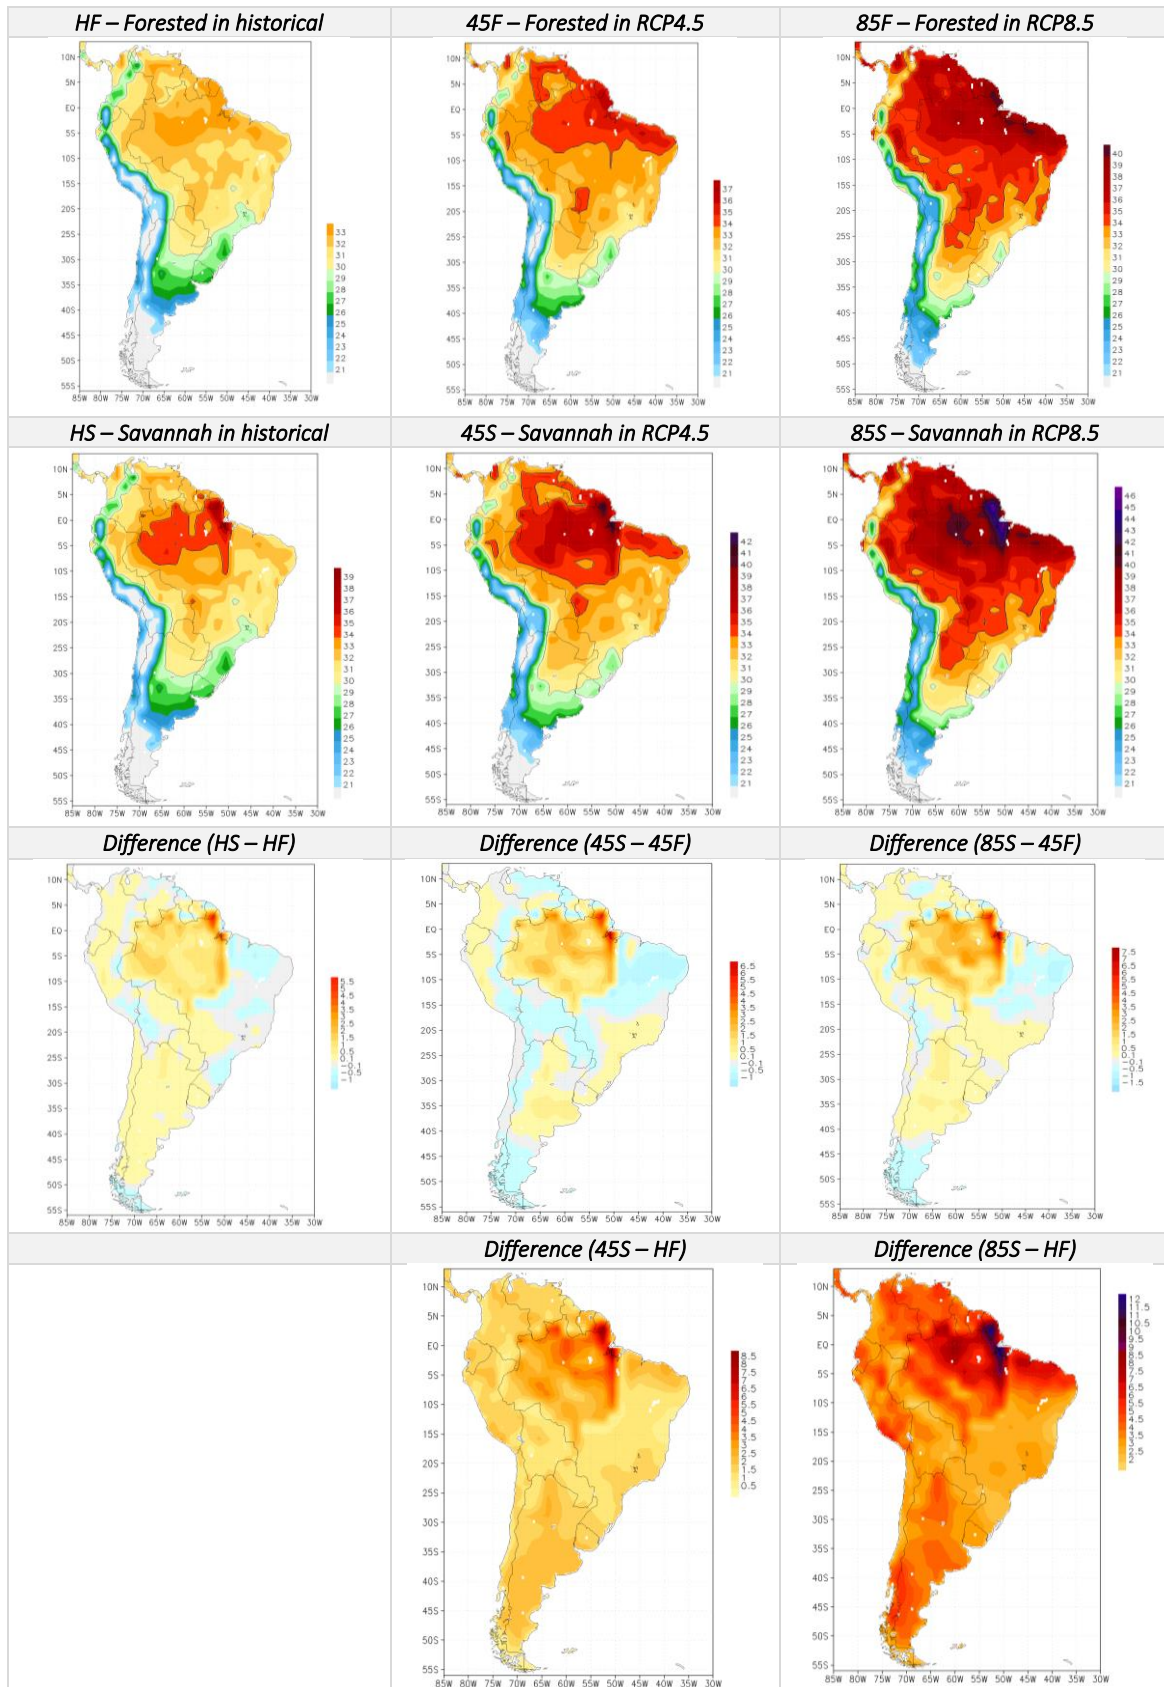

**Supplementary Figure 4.** Average daily maxima of the outdoor WBGT (in °C) for the warmest months according to global climate change scenarios for the historical (1980–2010) and RCP4.5 and RCP8.5 (2073–2100) periods, and land use scenarios. Legend: global warming scenarios (Historical – H, RCP4.5 – 45, RCP8.5 – 85) and land use scenarios (Forested – F and Savannah – S).

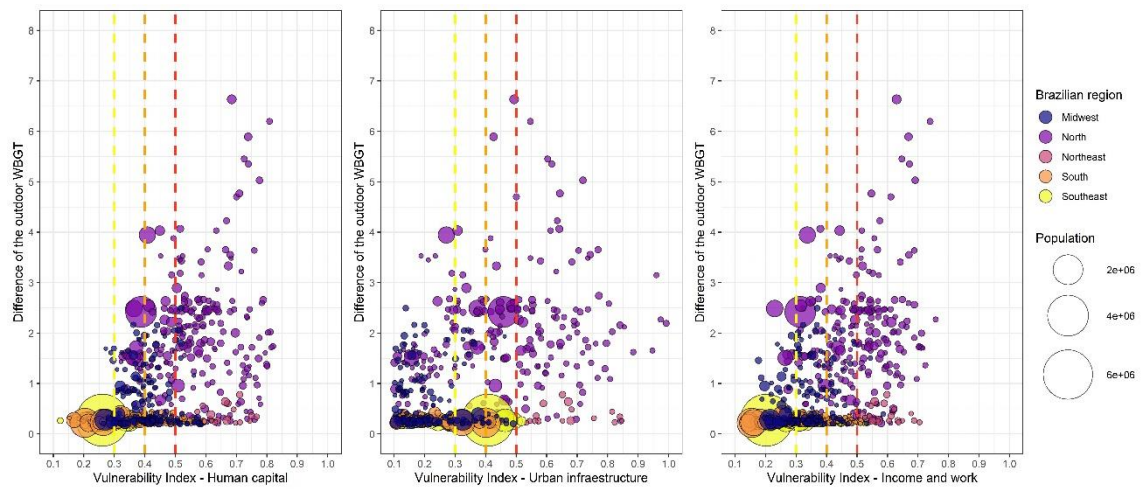

**Supplementary Figure 5. Municipalities impacted by Amazon savannization RCP8.5 global warming scenario (2073–2100), according to the social vulnerability index (SVI) components.** Legend: The impacted municipalities were defined as those with a difference between the average daily maximum of the outdoor WBGT in the hottest month (85S – 85F scenarios) higher than 0.2. The SVI was classified: 0.3 to 0.4: moderate vulnerability (dashed yellow line); 0.4 to 0.5: high vulnerability (dashed orange line); greater than 0.5: very high vulnerability (dashed red line). The impacted population comprised 29,648,362 people, of which 42% reside in the northern region, 35% in the southern region, 16% in the southeastern region, and 7% in the midwestern region.



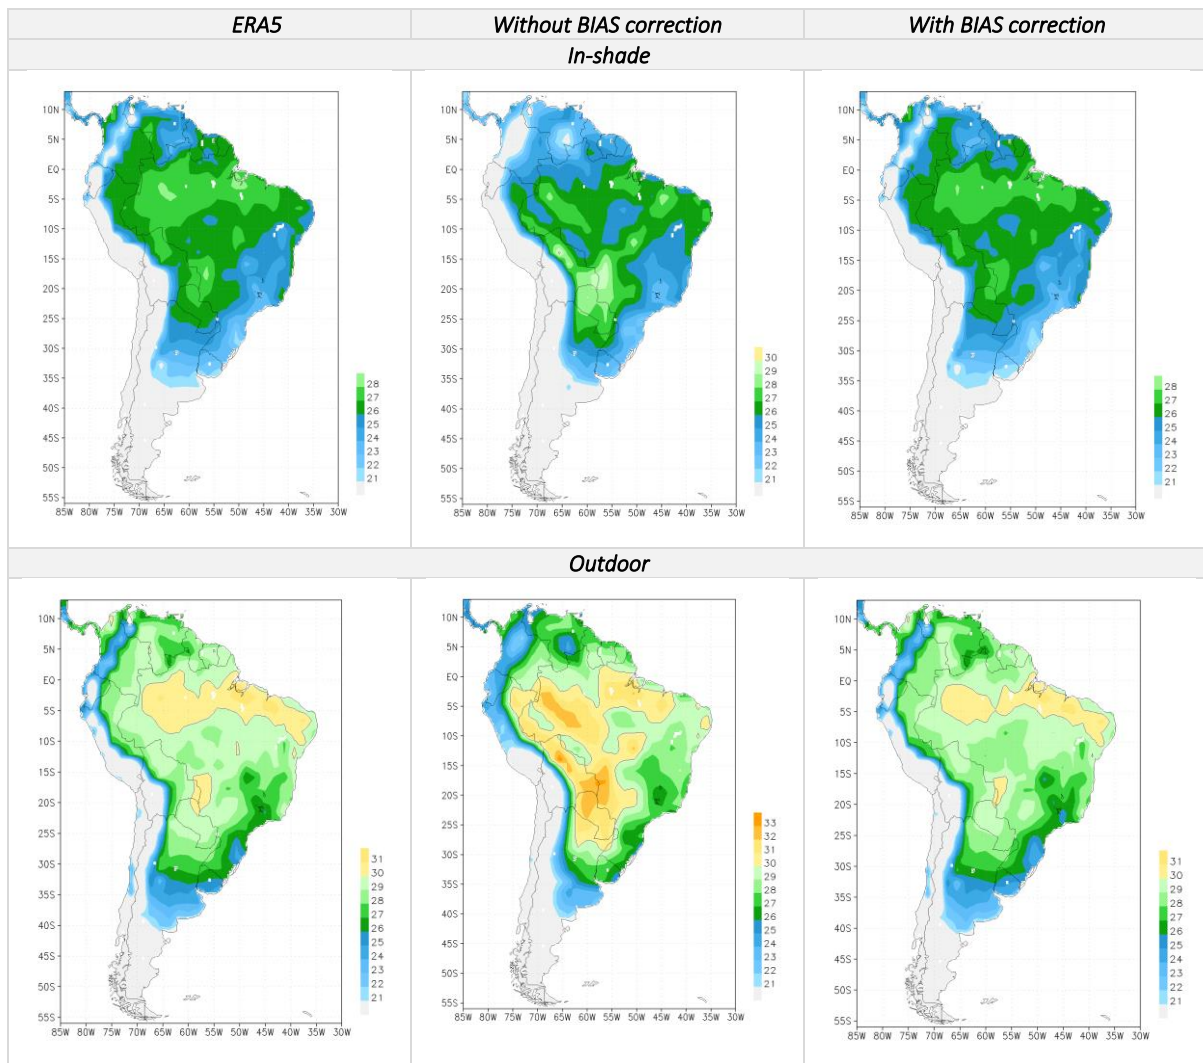

**Supplementary Figure 6. In-shade and outdoor WBGT (in °C) average 15 UTC December 1991-2000, for reanalysis ERA5 (left) and forested simulation without BIAS correction (center) and with correction (right).**
